# Supplementary material for: Thiol-functionalized metal–organic frameworks embedded with chelator-modified magnetite for high-efficiency and recyclable mercury removal in aqueous solutions
Source: Royal Society of Chemistry journal article supplement (doi:10.1039/d1ta10906e), 2022-01-01
Supplement: d1ta10906e1.pdf [file d1ta10906e1.pdf]

1 Supporting Information

2 Thiol-Functionalized Metal-organic Framework  
3 Embedded with Chelator-modified Magnetite for the  
4 High-Efficiency and Recyclable Mercury Removal in  
5 Aqueous Solution

6 *Yuliang Li, Mengxi Tan, Guangxia Liu, Dunfeng Si, Ning Chen\*, Dongmei Zhou\**

7 *State Key Laboratory of Pollution Control and Resource Reuse, School of the*

8 *Environment, Nanjing University, Nanjing 210023, P. R. China.*

9

10

11

*\* Corresponding author.*

12

*Email address: chenning@nju.edu.cn (N. Chen);*

13

*dmzhou@nju.edu.cn (D. Zhou)*

14

15

16

Number of Pages: 19

17

Number of Texts: 3

18

Number of Figures: 11

19

Number of Tables: 4

20

21 **Text S1. Materials**

22

All chemical agents were used as received without further purification

23 <sup>1, 2</sup>. Benzene-1,3,5-tricarboxylic acid (H<sub>3</sub>BTC, 98.0%), Cu(NO<sub>3</sub>)<sub>2</sub>·3H<sub>2</sub>O(≥ 99%,  
24 AR), dithioglycol (80%, AR), 4-(5)-imidazoledithiocarboxylic acid (DTIM,  
25 70%, CP), (3-glycidyloxypropyl)-trimethoxysilane (GLP, 97%), Fe<sub>3</sub>O<sub>4</sub>  
26 nanoparticles (Fe<sub>3</sub>O<sub>4</sub>-NPs 98%), Hg(NO<sub>3</sub>)<sub>2</sub> (AR) were obtained from Aladdin  
27 Reagent Co., Ltd., Shanghai, China. Toluene (≥ 99.5%, AR), thiourea (≥ 99%,  
28 AR), methanol (≥ 99.9%, GC), ethanol (75%, AR), HNO<sub>3</sub> (CMOS), NaOH (≥  
29 96.0%, AR), HCl (GR) were purchased from the Sinopharm Group  
30 Chemical Reagent Co., Ltd., China. All solutions were prepared using ultrapure  
31 water (18.2 M ·cm<sup>-1</sup>) from a Synergy UV ultrapure water system with Millipak-40 filter  
32 unit (Millipore Corporation Merck KGaA, Darmstadt, Ge).  
33

## 34 Text S2. Characterization.

35 The morphology and detailed microstructure of MOFs and its derivatives were  
36 examined by scanning electron microscopy (SEM, Quanta 250 FEG-SEM) and  
37 transmission electron microscopy (TEM, JEM-2100f) images equipped with energy-  
38 dispersive spectroscopy (EDS). Powder X-ray diffraction (XRD, Bruker-D8 ADVANCE)  
39 patterns were recorded on a powder diffractometer with the Cu  $K\alpha$  ( $\lambda = 1.5418 \text{ \AA}$ ). The  
40 spectra were scanned in the range of  $10^\circ < 2\theta < 70^\circ$  with a  $0.018^\circ$  step width and at  $3^\circ$   
41  $\text{min}^{-1}$ . The X-ray photoelectron spectroscopy (XPS) measurements were carried out on  
42 an ESCALAB 250Xi spectrometer (Thermo Scientific, USA) equipped with a pass energy  
43 of 30 eV with a power of 100 W (10 kV and 10 mA) and a mono-chromatized Al  $K\alpha$  X-  
44 ray ( $h\nu = 1486.65 \text{ eV}$ ) source. All samples were analyzed under the pressure less than  
45  $1.0 \times 10^{-9} \text{ Pa}$  with a step of 0.05 eV. Spectra were acquired through the Avantage  
46 software (Version 5.979). Fourier transform infrared (FTIR) spectra were recorded on  
47 a Thermo Fisher Nicolet iS5 spectrometer. Magnetic properties of  $\text{Fe}_3\text{O}_4@DTIM$ -  
48  $\text{MOF@SH}$  was measured by a vibrating sample magnetometer (VSM) (PPMS-9T  
49 Quantum Design, American) at room temperature in a magnetic field strength of 1  
50 Tesla. The zeta potential of  $\text{Fe}_3\text{O}_4@DTIM\text{-MOF@SH}$  was recorded by Nanoscale and  
51 zeta potential analyzer (Nano ZS90). The specific surface area, pore volume and pore  
52 size distribution of  $\text{Fe}_3\text{O}_4@DTIM\text{-MOF@SH}$  samples were examined by multipoint  $\text{N}_2$   
53 adsorption and desorption isotherms (up to  $P/P_0 = 1$  and 77 K) by an automatic surface  
54 area and porosity analyzer (ASAP 2460, Micromeritics, America) under high vacuum in  
55 a clean system with a diaphragm pumping system.

### 56 **Text S3. DFT calculation**

57        Firstly, we use the program of GaussView to construct the cluster model (Figure  
58 S7). Then, we use Multifunctional wavefunction analyzer (Multiwfn) to generate the  
59 input file of the ORCA program for restrictive optimization with the hybrid functional  
60 PBE0<sup>3</sup>. In order to examine the convergence trend of the optimization process, the  
61 OfakeG tool was used to convert the output file into a pseudo Gaussian output file,  
62 which was further processed with GaussView.

64 **Table S1.** Secific surface area/pore volume for the HKUST-1and Fe<sub>3</sub>O<sub>4</sub>@DTIM-  
65 MOF@SH Composites.

| Sample                                      | S <sub>BET</sub> <sup>a</sup> (m <sup>2</sup> g <sup>-1</sup> ) | V <sub>pore</sub> <sup>b</sup> (cm g <sup>-1</sup> ) |
|---------------------------------------------|-----------------------------------------------------------------|------------------------------------------------------|
| HKUST-1                                     | 1350                                                            | 0.7013                                               |
| Fe <sub>3</sub> O <sub>4</sub> @DTIM-MOF@SH | 827                                                             | 0.4058                                               |

66 <sup>a</sup>S<sub>BET</sub> represents BET surface areas obtained from N<sub>2</sub> adsorption isotherms.

67 <sup>b</sup>V<sub>pore</sub> represents pore volumes obtained from N<sub>2</sub> adsorption isotherms.

68

69

70 **Table S2.** Experimental values and parameters of pseudo-second-order adsorption  
71 kinetics models.

| Sample                                      | Pseudo-second-order-kinetic                   |                |       |                                    |                       |
|---------------------------------------------|-----------------------------------------------|----------------|-------|------------------------------------|-----------------------|
|                                             | $K_1$ (mg g <sup>-1</sup> min <sup>-1</sup> ) | R <sup>2</sup> | S     | Fitted $Q_e$ (mg g <sup>-1</sup> ) | $K_d$                 |
| Fe <sub>3</sub> O <sub>4</sub> @DTIM-MOF@SH | 0.29                                          | 0.99           | 0.009 | 10.31                              | 6.2 × 10 <sup>5</sup> |

72

73

74 **Table S3.** Isotherm model parameters for Hg<sup>2+</sup> adsorption of Fe<sub>3</sub>O<sub>4</sub>@DTIM-MOF@SH

| Sample                                          | Langmuir isotherm |       |                                    |                             | Freundlich isotherm |       |      |
|-------------------------------------------------|-------------------|-------|------------------------------------|-----------------------------|---------------------|-------|------|
|                                                 | $R_1^2$           | $K_L$ | Fitted $Q_e$ (mg g <sup>-1</sup> ) | $Q_e$ (mg g <sup>-1</sup> ) | $R_2^2$             | $K_F$ | 1/n  |
| Fe <sub>3</sub> O <sub>4</sub> @DTIM<br>-MOF@SH | 0.995             | 0.023 | 873.4                              | 756.9                       | 0.96                | 28.   | 0.65 |
|                                                 |                   |       |                                    |                             | 8                   | 06    | 3    |

75

76

77 **Table S4.** Comparison of various adsorbents for Hg<sup>2+</sup> removal.

| Adsorbent                                                               | $Q_e$ (mg g <sup>-1</sup> ) | $K_d$ (mL g <sup>-1</sup> ) | Reference |
|-------------------------------------------------------------------------|-----------------------------|-----------------------------|-----------|
| Thiol-functionalized [Cu <sub>3</sub> (BTC) <sub>2</sub> ] <sub>n</sub> | 714.29                      | $4.73 \times 10^5$          | 1         |
| Zn <sub>4</sub> O(L) <sub>3</sub>                                       | 102.8                       | $3.16 \times 10^3$          | 4         |
| MOF-74                                                                  | 63                          | —                           | 5         |
| ZIF-90-SH                                                               | 22.45                       | —                           | 6         |
| Bi-I-functionalized magnetic HKUST-1                                    | 264                         | —                           | 7         |
| Sulfur-functionalized MOF FJI-H12                                       | 439.8                       | $1.86 \times 10^6$          | 8         |
| Hydroxyl-functionalized MOF                                             | 278                         | —                           | 9         |
| Zr-DMBD                                                                 | 198.2                       | $9.99 \times 10^5$          | 10        |
| LMOFs                                                                   | 380                         | $6.45 \times 10^5$          | 11        |
| MIL-101-Thymine                                                         | 51.27                       | —                           | 12        |
| Thiol-functionalized MOF                                                | 210                         | —                           | 13        |
| <b>Fe<sub>3</sub>O<sub>4</sub>@DTIM-MOF@SH</b>                          | 756.9                       | $6.2 \times 10^5$           | This work |

78

79



80

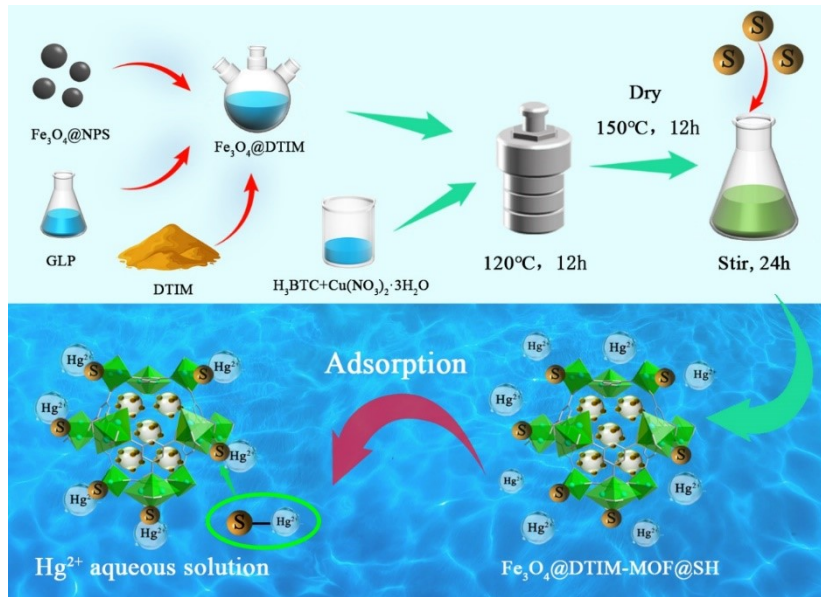

81

82 **Figure S1.** Schematic of preparation process of the  $\text{Fe}_3\text{O}_4@DTIM-MOF@SH$  composite.

83

84

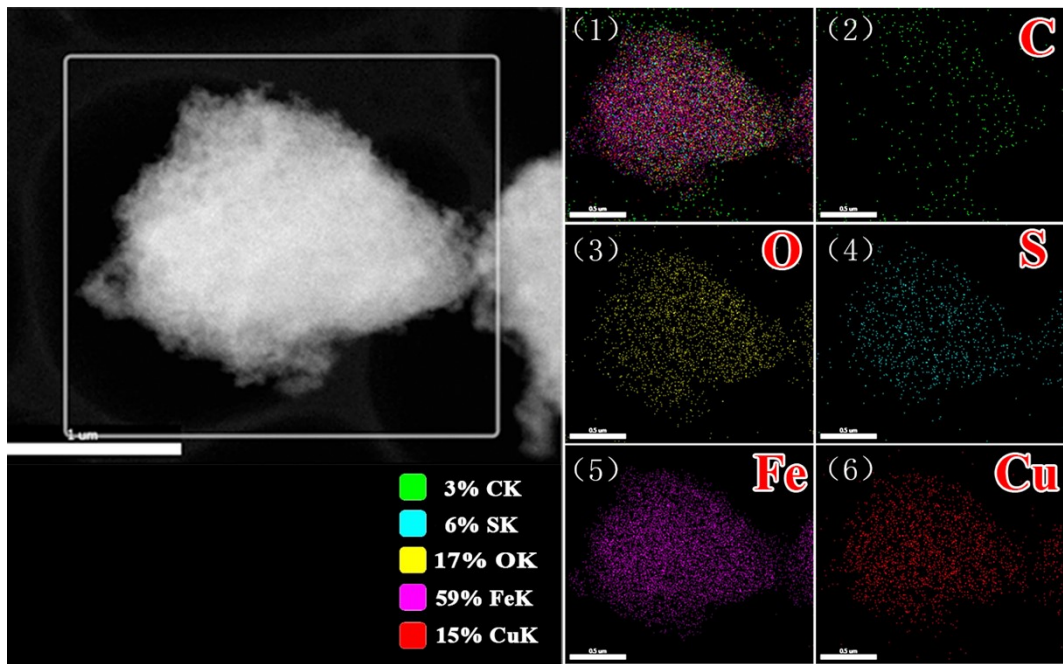

85

86 **Figure S2.** STEM image and EDX maps of  $\text{Fe}_3\text{O}_4@\text{DTIM-MOF}@\text{SH}$

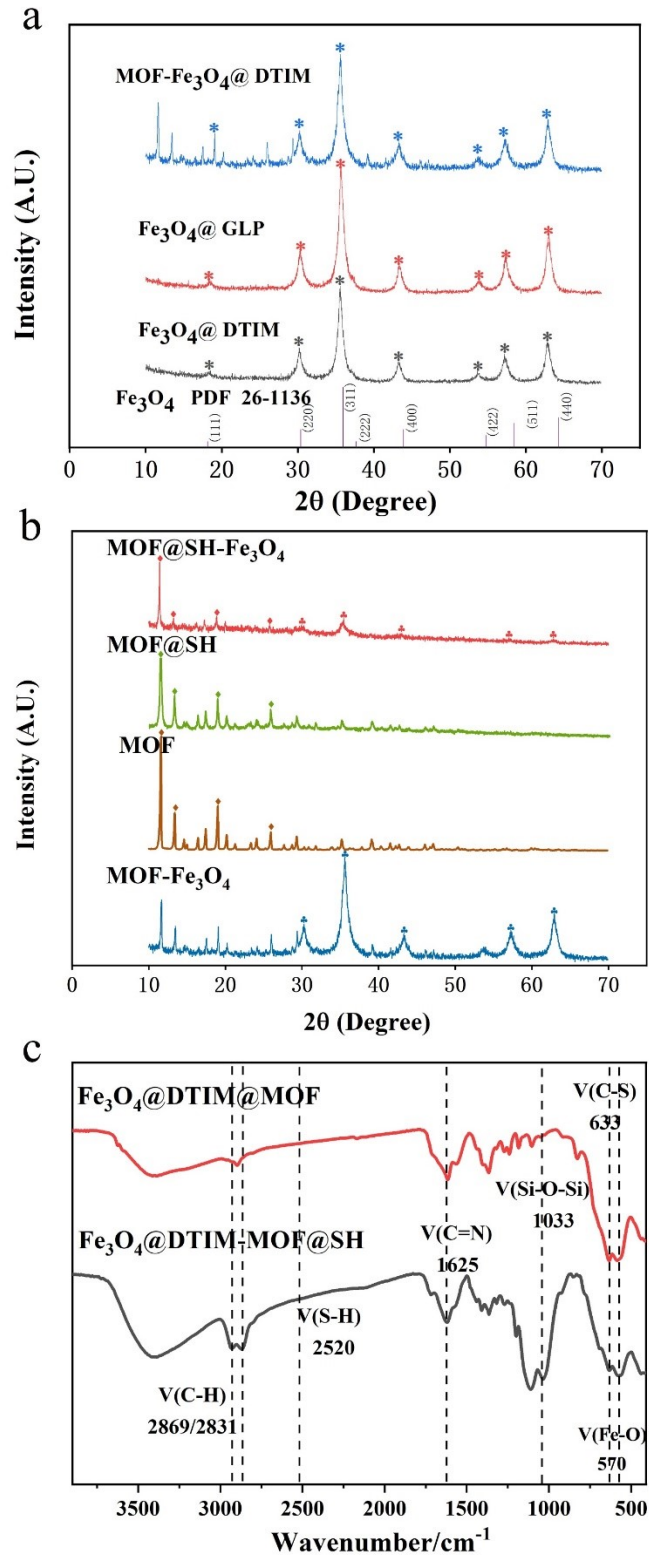

87

88 **Figure S3.** a) XRD patterns of as-synthesized MOF-Fe<sub>3</sub>O<sub>4</sub>@DTIM, Fe<sub>3</sub>O<sub>4</sub>@GLP,  
 89 Fe<sub>3</sub>O<sub>4</sub>@DTIM and diffractograms of the Fe<sub>3</sub>O<sub>4</sub>; b) XRD patterns of MOF@SH-Fe<sub>3</sub>O<sub>4</sub>,  
 90 MOF@SH, MOF and MOF-Fe<sub>3</sub>O<sub>4</sub>; c) FT-IR spectra of Fe<sub>3</sub>O<sub>4</sub>@DTIM-MOF and  
 91 Fe<sub>3</sub>O<sub>4</sub>@DTIM-MOF@SH composite before adsorption.

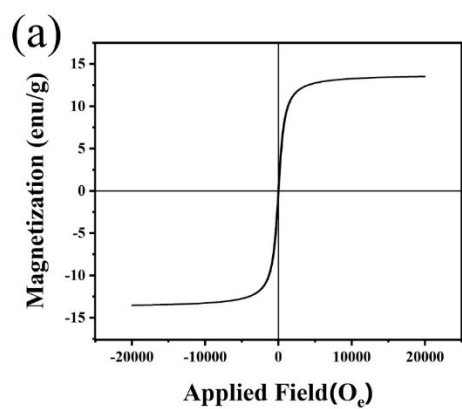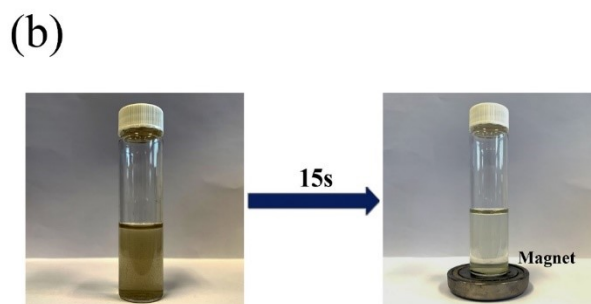

93

94 **Figure S4.** VSM analysis of  $\text{Fe}_3\text{O}_4@\text{DTIM-MOF@SH}$  and (b) magnetic separation of

95  $\text{Fe}_3\text{O}_4@\text{DTIM-MOF@SH}$  composite.

96

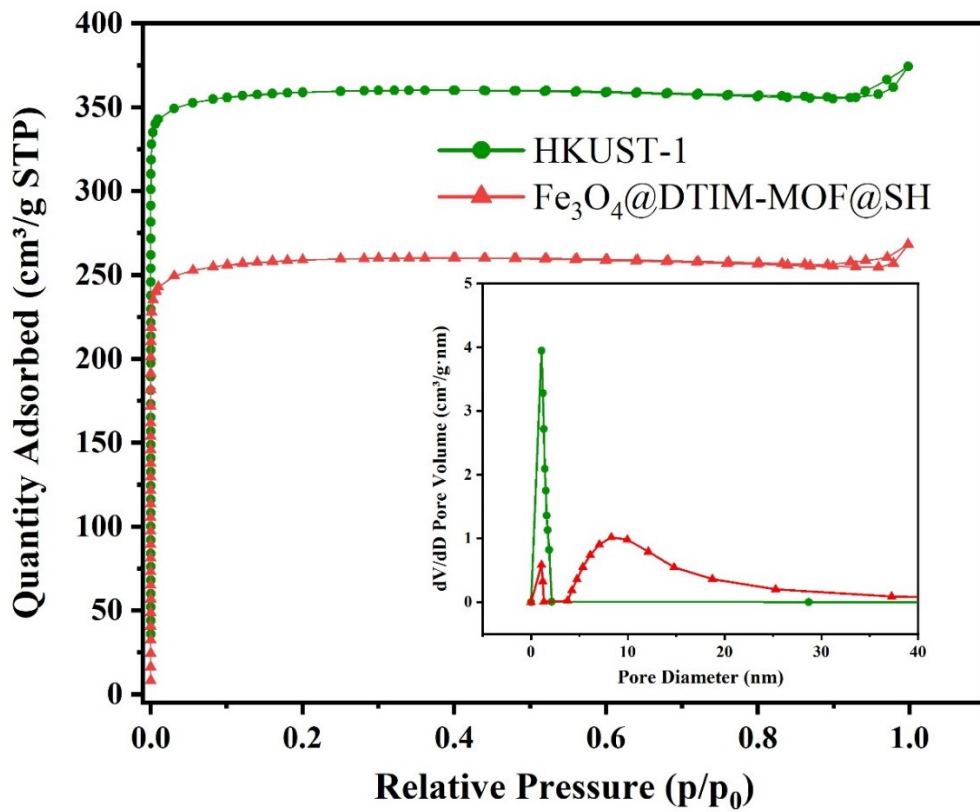

97

98 **Figure S5.** HKUST-1 (green) and  $Fe_3O_4@DTIM-MOF@SH$  (red) composites'  $N_2$   
 99 adsorption isotherms at 77 K respectively; the inset shows the pore size distribution  
 100 of each sample.

101

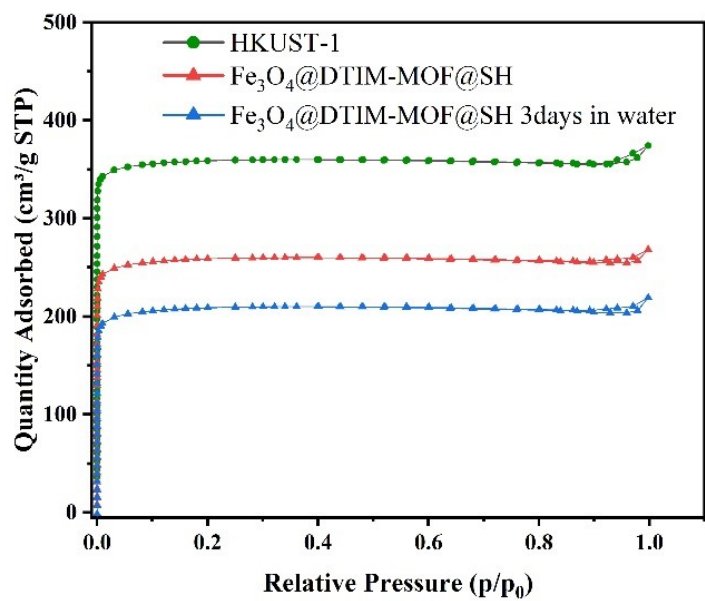

102

103 **Figure S6.** HKUST-1 (green) ; Fe<sub>3</sub>O<sub>4</sub>@DTIM-MOF@SH (red) and Fe<sub>3</sub>O<sub>4</sub>@DTIM-

104 MOF@SH upon immersion in water for 3 days (blue) composites' N<sub>2</sub> adsorption

105 isotherms at 77 K respectively

106

107

108

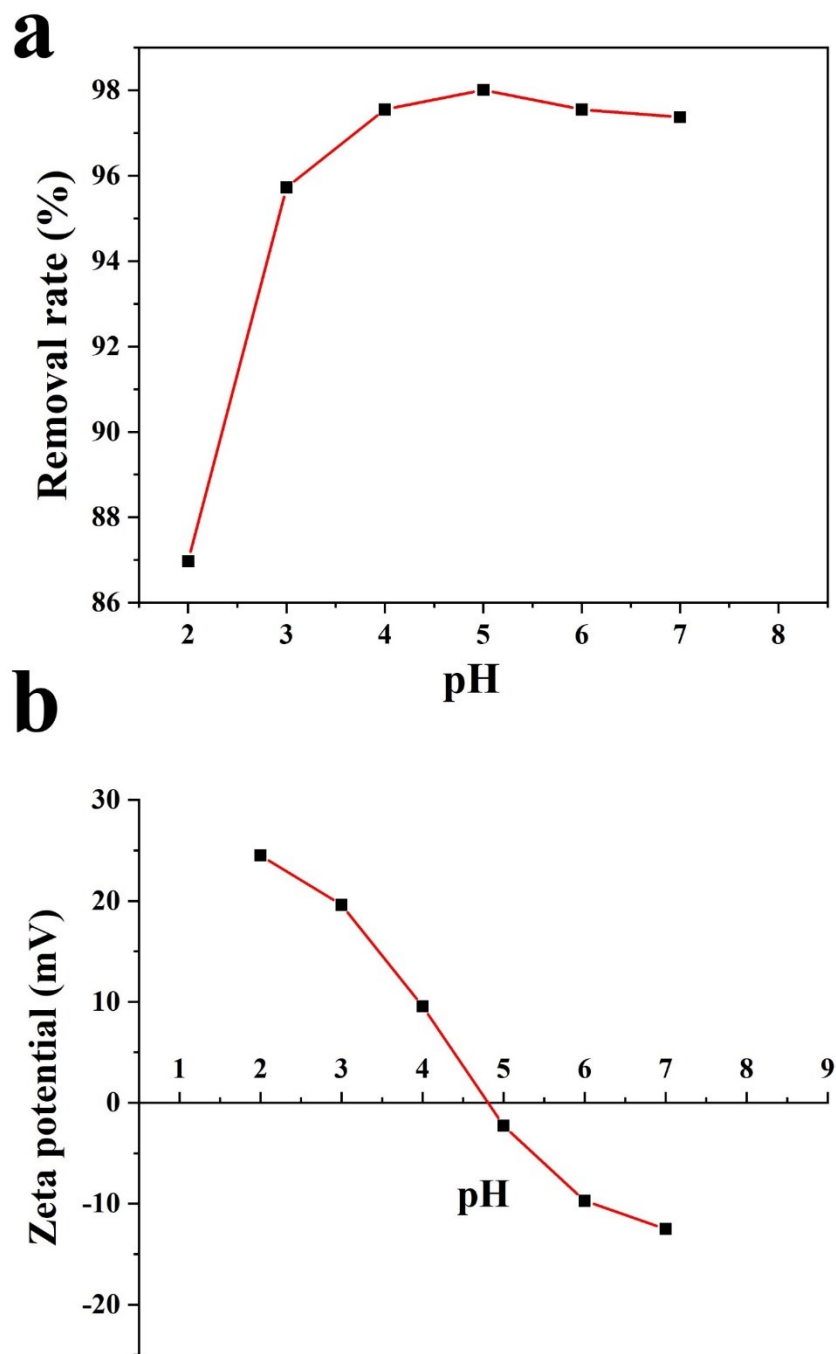

110

111 **Figure S7.** a) Effect of pH on the removal rate of  $\text{Hg}^{2+}$ ; b) zeta potential of  
112  $\text{Fe}_3\text{O}_4@\text{DTIM-MOF}@\text{SH}$ .

113

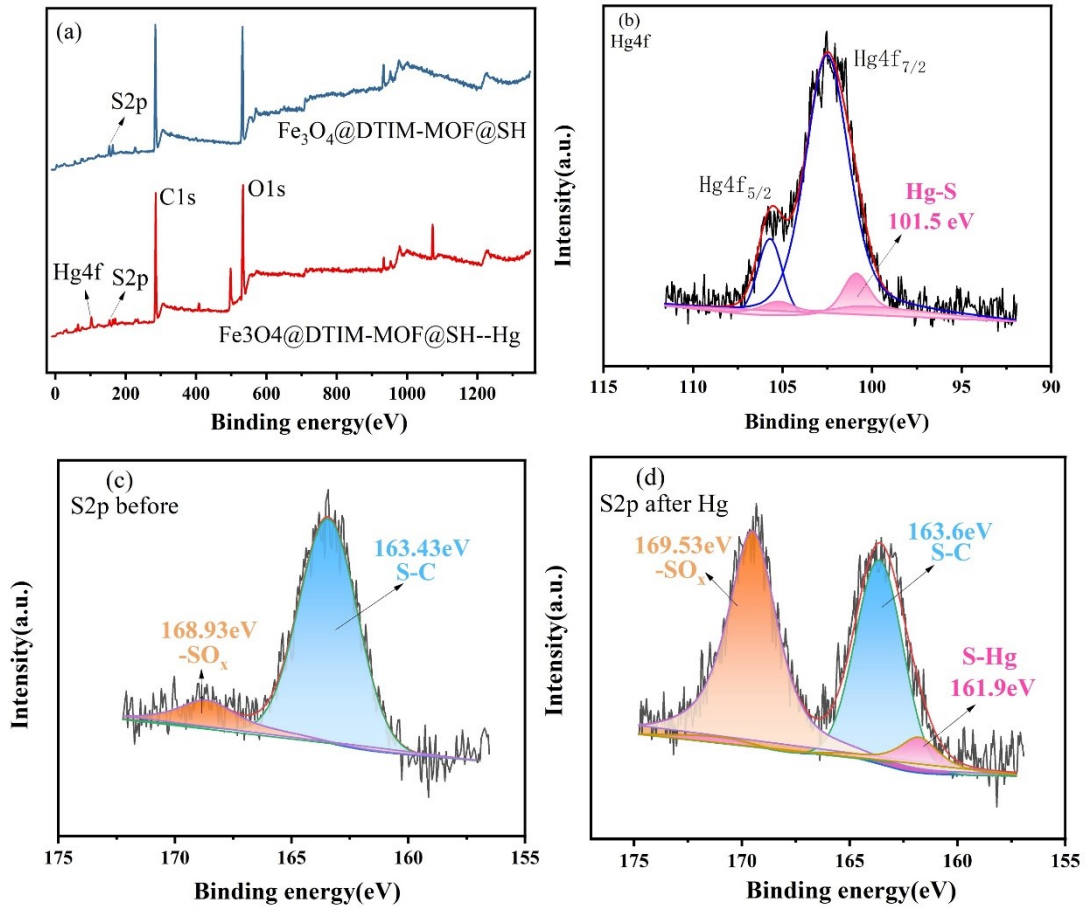

115

116 **Figure S8.** XPS Hg4f and S2p spectra of  $\text{Fe}_3\text{O}_4@DTIM-MOF@SH$  before and after  
 117 adsorption. Area filled with blue refers to S-C, orange refers to  $-\text{SO}_x$  and pink refers to  
 118 Hg-S and those binding energy are marked besides the peaks.

119



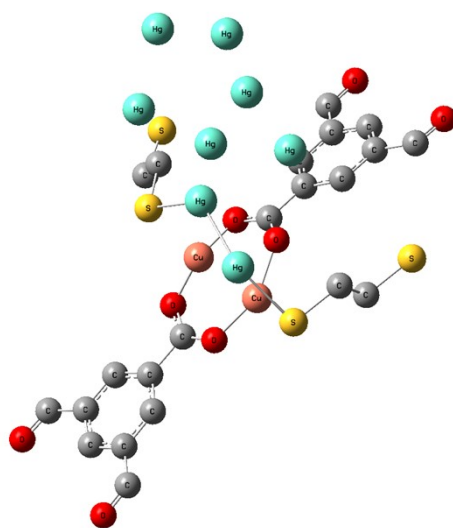

120

121 **Figure S9.** The cluster model of  $\text{Fe}_3\text{O}_4@\text{DTIM-MOF}@\text{SH}$  and  $\text{Hg}^{2+}$ . Atom filled with grey

122 refers to C, green refers to Hg, red refers to O, yellow refers to S and pink refer to Cu.

123

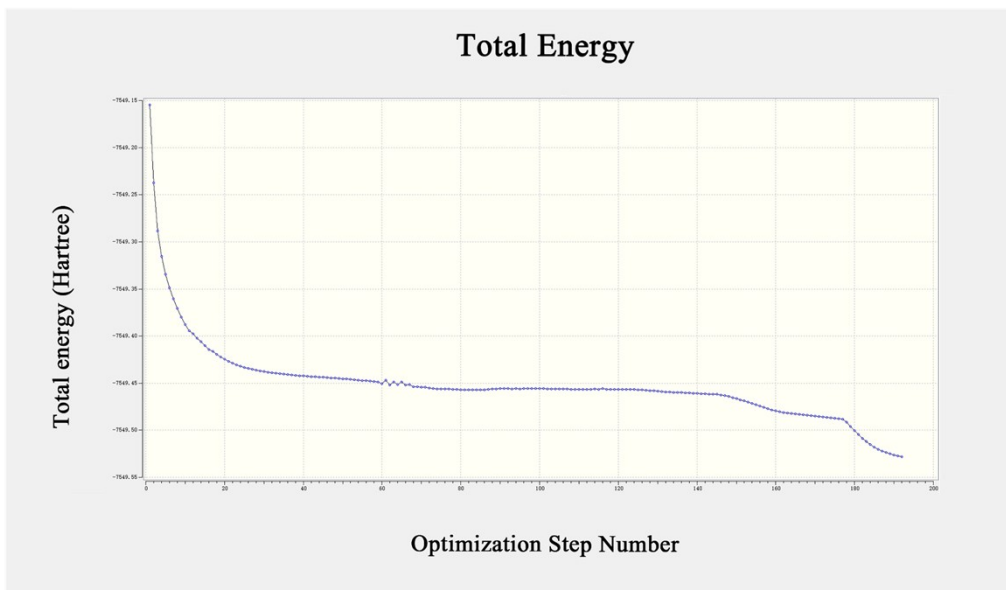

124

125 **Figure S10.** Energy convergence curve of the cluster model (Figure 11) after structural  
126 optimization.

127

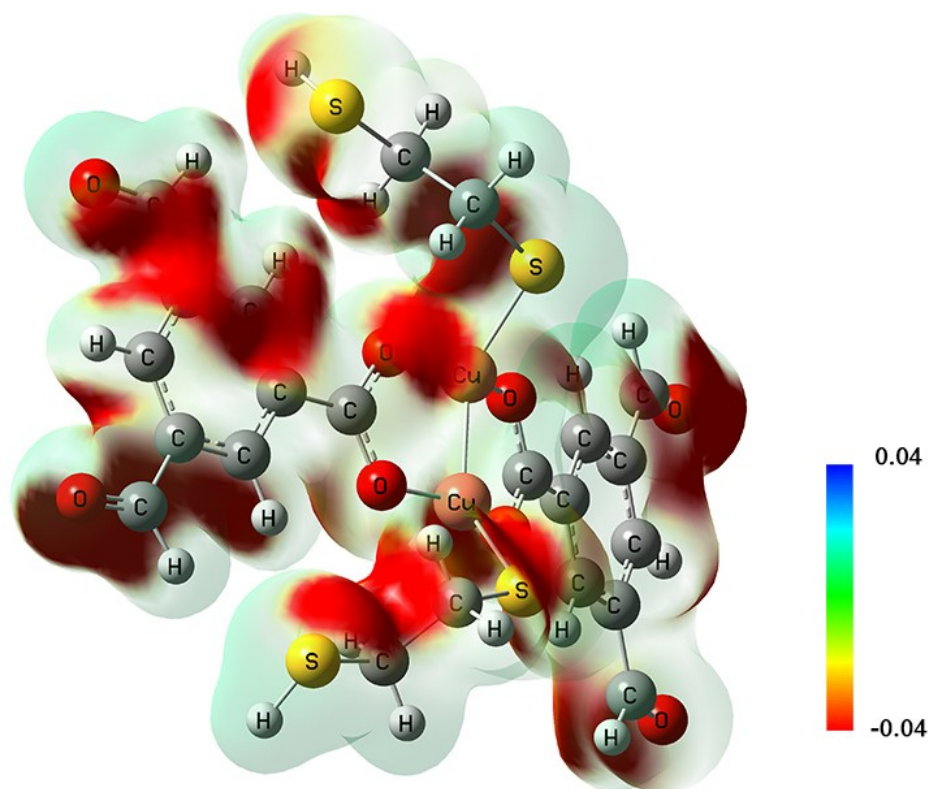

128

129 **Figure S11.** The electrostatic potential (ESP) population on the surface of  
130 Fe<sub>3</sub>O<sub>4</sub>@DTIM-MOF@SH.

131

## 132 References

- 133 1. F. Ke, L. G. Qiu, Y. P. Yuan, F. M. Peng, X. Jiang, A. J. Xie, Y. H. Shen and J. F. Zhu, *J Hazard Mater*,  
134 2011, **196**, 36-43.
- 135 2. A. Tadjarodi and A. Abbaszadeh, *Microchimica Acta*, 2016, **183**, 1391-1399.
- 136 3. T. Lu and F. Chen, *J Comput Chem*, 2012, **33**, 580-592.
- 137 4. J. He, K.-K. Yee, Z. Xu, M. Zeller, A. D. Hunter, S. S.-Y. Chui and C.-M. Che, *Chemistry of Materials*,  
138 2011, **23**, 2940-2947.
- 139 5. Y. Y. Xiong, J. Q. Li, X. F. Feng, L. N. Meng, L. Zhang, P. P. Meng, M. B. Luo and F. Luo, *Journal of*  
140 *Solid State Chemistry*, 2017, **246**, 16-22.
- 141 6. Z. Wang and S. M. Cohen, *Chemical Society Reviews*, 2009, **38**, 1315-1329.
- 142 7. L. Huang, M. He, B. Chen and B. Hu, *Journal of Materials Chemistry A*, 2015, **3**, 11587-11595.
- 143 8. L. Liang, Q. Chen, F. Jiang, D. Yuan, J. Qian, G. Lv, H. Xue, L. Liu, H.-L. Jiang and M. Hong, *Journal*  
144 *of Materials Chemistry A*, 2016, **4**, 15370-15374.
- 145 9. F. Luo, J. L. Chen, L. L. Dang, W. N. Zhou, H. L. Lin, J. Q. Li, S. J. Liu and M. B. Luo, *Journal of*  
146 *Materials Chemistry A*, 2015, **3**, 9616-9620.
- 147 10. K.-K. Yee, N. Reimer, J. Liu, S.-Y. Cheng, S.-M. Yiu, J. Weber, N. Stock and Z. Xu, *Journal of the*  
148 *American Chemical Society*, 2013, **135**, 7795-7798.
- 149 11. N. D. Rudd, H. Wang, E. M. Fuentes-Fernandez, S. J. Teat, F. Chen, G. Hall, Y. J. Chabal and J. Li,  
150 *ACS applied materials & interfaces*, 2016, **8**, 30294-30303.
- 151 12. X. Luo, T. Shen, L. Ding, W. Zhong, J. Luo and S. Luo, *Journal of Hazardous Materials*, 2016, **306**,  
152 313-322.
- 153 13. M. R. Sohrabi, *Microchimica Acta*, 2013, **181**, 435-444.
- 154
